# Supplementary material for: Molecular phylogeny of diplomonads and enteromonads based on SSU rRNA, alpha-tubulin and HSP90 genes: Implications for the evolutionary history of the double karyomastigont of diplomonads
Source: PubMed Central journal article supplement (PMC2496913; doi:10.1186/1471-2148-8-205), 2008-07-15

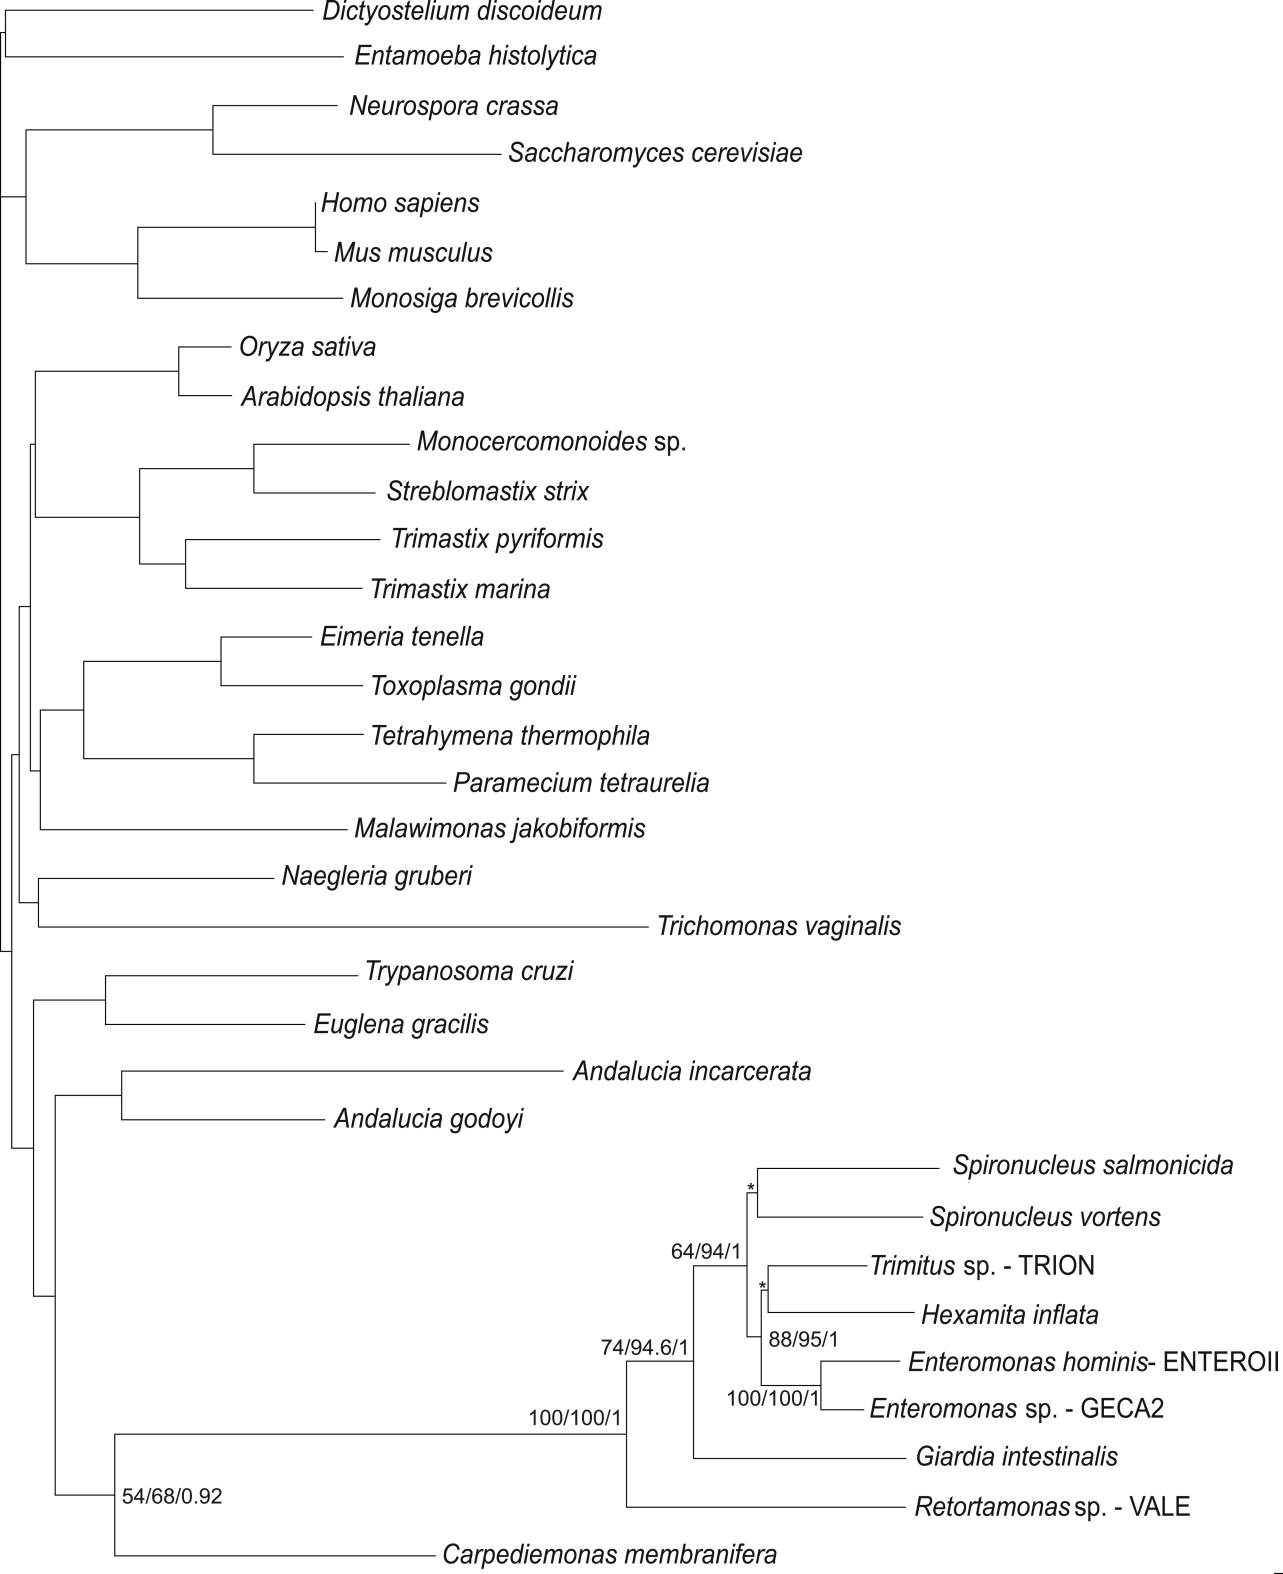

Supplement: 1471-2148-8-205-S3.pdf [file 1471-2148-8-205-S3.pdf]
