# Supplementary material for: Molecular phylogeny of diplomonads and enteromonads based on SSU rRNA, alpha-tubulin and HSP90 genes: Implications for the evolutionary history of the double karyomastigont of diplomonads
Source: PubMed Central journal article supplement (PMC2496913; doi:10.1186/1471-2148-8-205), 2008-07-15
Supplement: 1471-2148-8-205-S5.pdf [file 1471-2148-8-205-S5.pdf]

| <b>Taxon</b>                             | <b>Isolate</b> | <b>SSU rRNA gene</b> | <b><math>\alpha</math>-tubulin</b> | <b>hsp90</b> |
|------------------------------------------|----------------|----------------------|------------------------------------|--------------|
| <i>Acanthometra</i> sp.                  |                | AF063240.1           |                                    |              |
| <i>Acrasis rosea</i>                     |                | AF011458.1           |                                    |              |
| <i>Andalucia godoyi</i> AND28            |                | AY965870.1           | EU334874                           | EU334880     |
| <i>Andalucia incarcerata</i>             |                |                      | AAK27844.1                         | EU334886     |
| <i>Arabidopsis thaliana</i>              |                |                      | NP_193232.1                        | AAN31859     |
| <i>Carpediemonas membranifera</i>        |                | AY117416.1           | AAM77193.1                         | ABC54644     |
| <i>Cercomonas</i> ATCC50317              |                | U42449.1             |                                    |              |
| <i>Clathrulina elegans</i>               |                | AY305009.1           |                                    |              |
| <i>Cryptosporidium parvum</i>            |                | L16996.1             |                                    |              |
| <i>Cyanophora paradoxa</i>               |                | X68483.1             |                                    |              |
| <i>Dermamoeba algensis</i>               |                | AY294148.1           |                                    |              |
| <i>Dictyostelium discoideum</i>          |                |                      | XP_637058.1                        | P54651       |
| <i>Eimeria acervulina</i>                |                |                      | CAA61255.1                         |              |
| <i>Eimeria tenella</i>                   |                |                      | CAA61255.1                         | O44001       |
| <i>Entamoeba histolytica</i>             |                |                      | P31017                             | XP_653132    |
| Enteromonad                              | PSEUD          | AY921408             | EF551185                           |              |
| Enteromonad                              | PYX            | AY921407             |                                    |              |
| Enteromonadidae sp.                      | KR-PO3         | AY701872.1           |                                    |              |
| <i>Enteromonas hominis</i>               | ENTEROII       | EF551180             | EF551184                           | EF551168     |
| <i>Enteromonas</i> sp.                   | GECA2          | EF551178             | EF551186                           | EF551169     |
| <i>Enteromonas</i> sp.                   | CUORA1         | EF551179             |                                    |              |
| <i>Euglena gracilis</i>                  |                |                      | P33625                             | AAQ24862.1   |
| <i>Giardia ardeae</i>                    |                | Z17210.1             |                                    |              |
| <i>Giardia intestinalis</i>              |                | M54878.1             | XP_001705720                       | BAD83616     |
| <i>Giardia intestinalis</i> isolate BAC7 |                | AF199444.1           |                                    |              |
| <i>Giardia microti</i>                   |                | AF006676.1           |                                    |              |
| <i>Giardia muris</i>                     |                | X65063.1             |                                    |              |
| <i>Giardia</i> sp.                       |                | U20351.1             |                                    |              |
| <i>Guillardia theta</i>                  |                | X57162.1             |                                    |              |
| <i>Hexamita inflata</i>                  |                | L07836.1             | AAC47085.1                         | AAR26696     |
| <i>Hexamita nelsoni</i>                  |                | EF050053.1           |                                    |              |
| <i>Homo sapiens</i>                      |                |                      | NP_006073                          | NP031381     |
| <i>Ichthyobodo</i> sp.                   |                | AY229972.1           |                                    |              |
| <i>Jakoba libera</i>                     |                | AF411288.1           |                                    |              |
| <i>Macropharyngomonas halophila</i>      |                | AF011465.1           |                                    |              |
| <i>Malawimonas jakobiformis</i>          |                | AY117420.1           | AAK27846.1                         | ABC54645     |

|                                   |               |            |                |              |
|-----------------------------------|---------------|------------|----------------|--------------|
| <i>Mesostigma viride</i>          |               | AJ250108.1 |                |              |
| <i>Monocercomonas</i> ATCC50210   |               |            | AAD05022.1     |              |
| <i>Monocercomonas ruminantium</i> | KOJ14         | AY319280.1 |                |              |
| <i>Monocercomonoides</i> sp.      |               |            |                | AAW221773    |
| <i>Monosiga brevicollis</i>       |               | AF100940.1 | AAK27410.1     | AAP51213     |
| <i>Mus musculus</i>               |               |            | NP_035783.1    | P11499       |
| <i>Naegleria gruberi</i>          |               | M18732.1   | P11237         | AAM937561    |
| <i>Neurospora crassa</i>          |               |            | XP_963223.1    | XP323482     |
| <i>Noctiluca scintillans</i>      |               | AF022200.1 |                |              |
| <i>Octomitus intestinalis</i>     |               | DQ366277.1 |                |              |
| <i>Oryza sativa</i>               |               |            | NP_001051132.1 | P33126       |
| <i>Paramecium tetraurelia</i>     |               |            | XP_001454509   | AAG00568     |
| <i>Podocoryne carnea</i>          |               | AF358092.1 |                |              |
| <i>Reclinomonas americana</i>     |               | AY117417.1 |                |              |
| <i>Retortamonas</i> sp.           | KOZA1         | AF439344.1 |                |              |
| <i>Retortamonas</i> sp.           | LOS           | AF439345.1 |                |              |
| <i>Retortamonas</i> sp.           | OVCE          | AF439346.1 |                |              |
| <i>Retortamonas</i> sp.           | ATCC<br>50375 | AF439347.1 |                |              |
| <i>Retortamonas</i> sp.           | VALE          | AF439348.1 |                | EF551172     |
| <i>Saccharomyces cerevisiae</i>   |               |            | NP_013625.1    | NP_015084    |
| <i>Schizosaccharomyces pombe</i>  |               | X58056.1   |                |              |
| <i>Spiroucleus salmonicida</i>    |               | DQ186595.1 | AAC47212       | ABC54647     |
| <i>Spiroucleus meleagridis</i>    |               | EF050054.1 |                |              |
| <i>Spiroucleus muris</i>          |               | EU043230   | AAC47088.1     |              |
| <i>Spiroucleus barkhanus</i>      |               | DQ186581.1 | DQ181579       |              |
| <i>Spiroucleus salmonis</i>       |               | DQ394703.1 |                |              |
| <i>Spiroucleus</i> sp.            | GEPA2H        | EF551181   |                |              |
| <i>Spiroucleus torosa</i>         |               | EF050055.1 |                |              |
| <i>Spiroucleus vortens</i>        |               | U93086.1   | AAB81021.1     | EF551170     |
| <i>Streblomastix strix</i>        |               |            | ABC97356.1     | AAO46123     |
| <i>Tetrahymena thermophila</i>    |               |            | XP_001022424   | AAD937561    |
| <i>Toxoplasma gondii</i>          |               |            | P10873.1       | AAP44977     |
| <i>Trepomonas agilis</i>          |               | AF015455.1 |                |              |
| <i>Trepomonas</i> sp.             | PPS6          | EF551174   |                |              |
| <i>Trepomonas steini</i>          | LUH3          | EF551173   |                |              |
| <i>Trichomonas vaginalis</i>      |               | U17510.1   | AAK83156.1     | XP_001317545 |
| <i>Trichonympha agilis</i>        |               | AB003920.1 |                |              |
| <i>Trimastix marina</i>           |               | AF244905.1 | ABC54661.1     | ABC54648     |

|                                |         |            |                                               |          |
|--------------------------------|---------|------------|-----------------------------------------------|----------|
| <i>Trimastix pyriformis</i>    |         | AF244903.1 | PEP, Trimastix pyriformis Cluster TPL00000212 | EU327684 |
| <i>Trimitus</i> sp.            | KOMPKOJ | EF551182   |                                               |          |
| <i>Trimitus</i> sp.            | IT1     | EF551176   |                                               |          |
| <i>Trimitus</i> sp.            | DOGA1   | EF551177   |                                               |          |
| <i>Trimitus</i> sp.            | RAPI1   | AY701873.1 |                                               |          |
| <i>Trimitus</i> sp.            | TRION   | AY701874.1 | EF551183                                      | EF551171 |
| <i>Trypanosoma cruzi</i>       |         |            | XP_802499.1                                   | A26125   |
| <i>Uncultured eukaryote</i>    | CHES12  | EF551175   |                                               |          |
| Uncultured <i>Oxymonas</i> sp. |         | AB092931.1 |                                               |          |
| <i>Volvox carteri</i>          |         | X53904.1   |                                               |          |
